# Supplementary material
Source: publisher figshare collection journal article supplement (https://gsapubs.figshare.com/ndownloader/files/38162994)

**Item I.** Igneous zircon cathodoluminescence image

**Ia. BFB1.1 & 1.2**


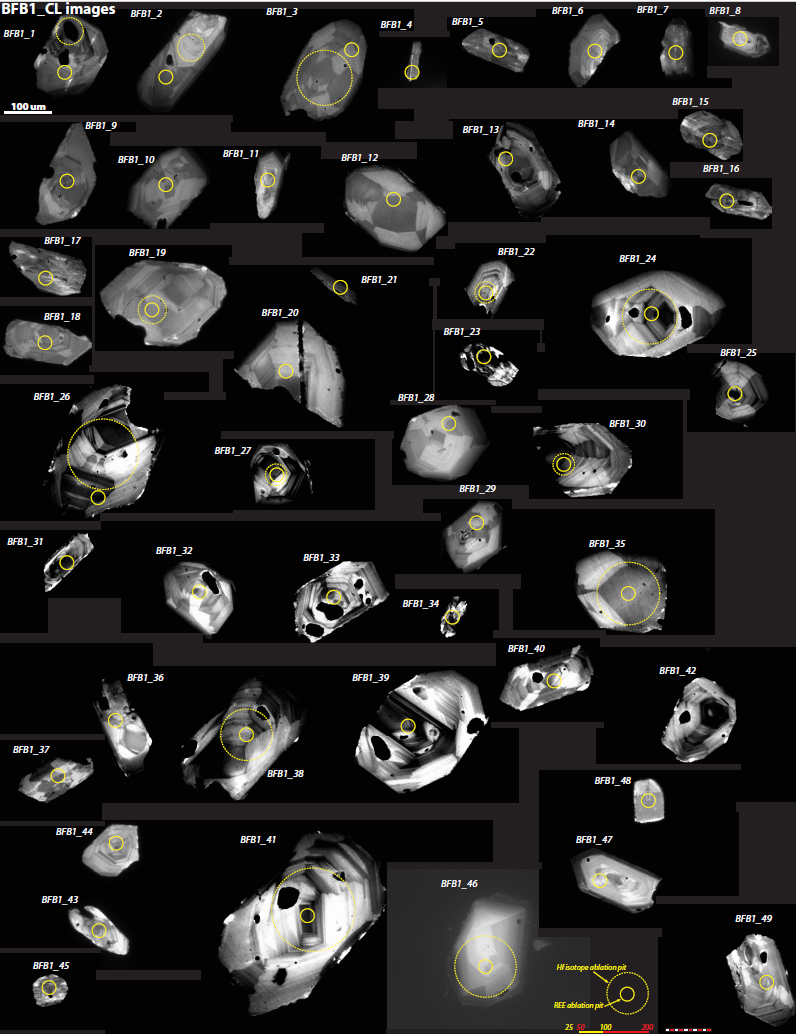


**Ib. QM1.1 & 1.2**


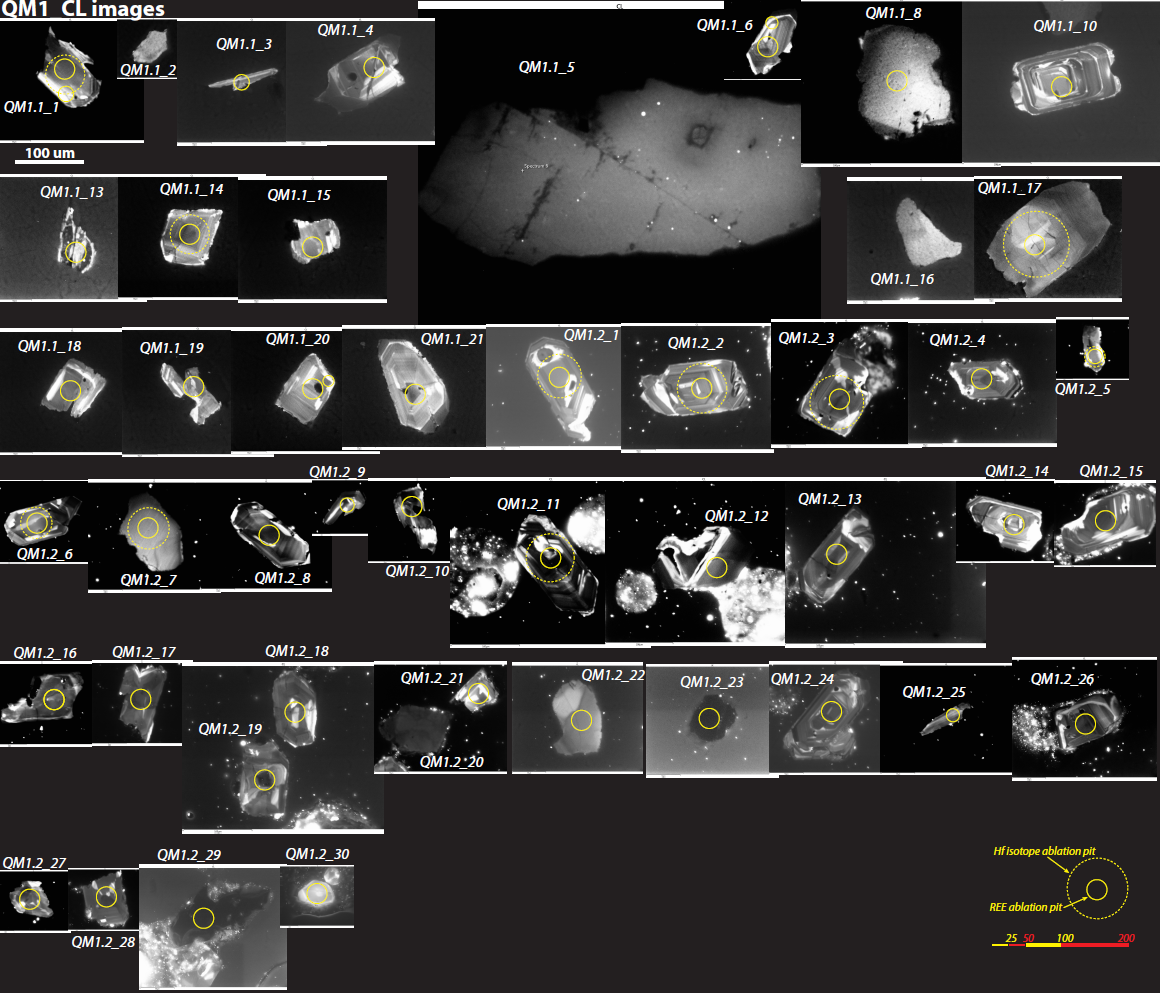


**Ic. SHCR1.1 & 1.2**


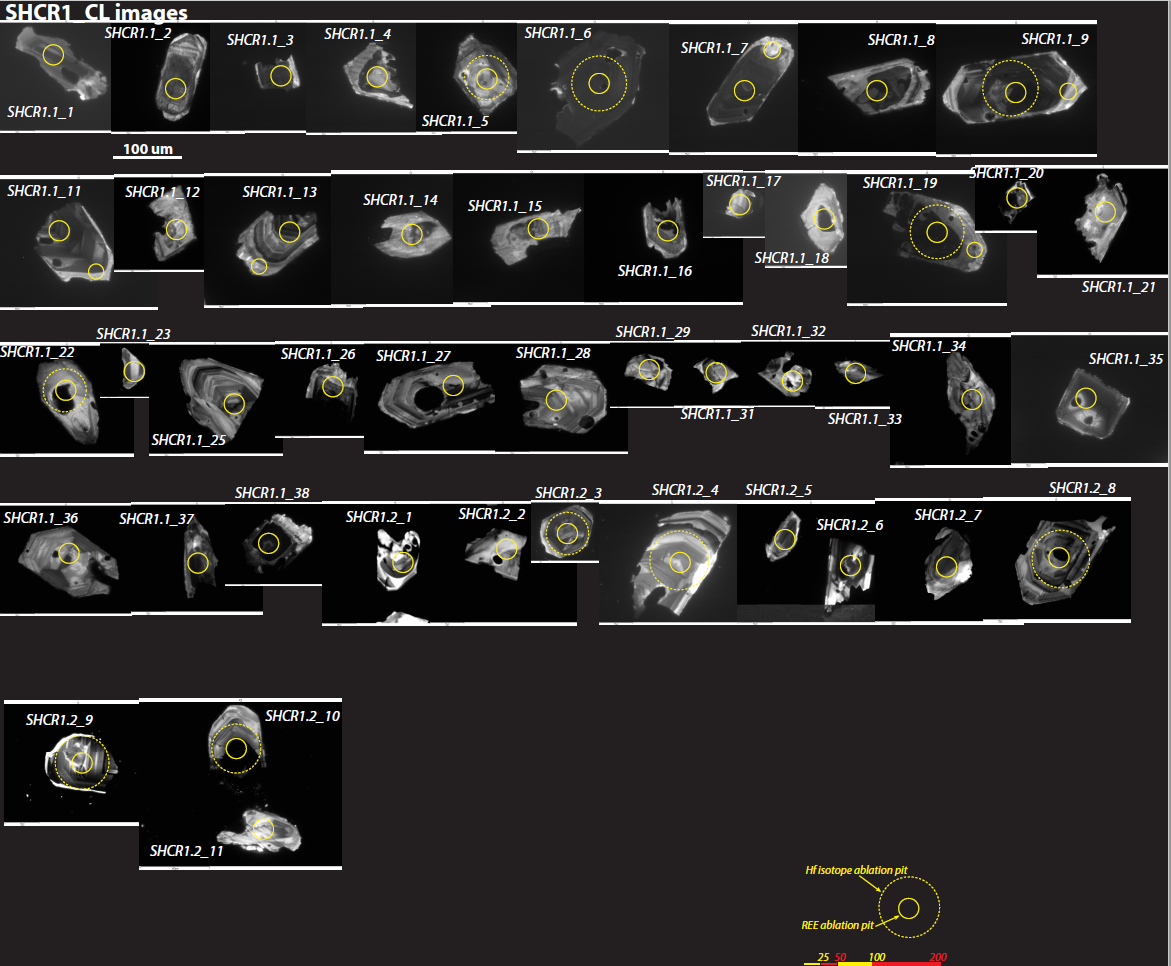


**Id. WMG1.1 & 1.2**


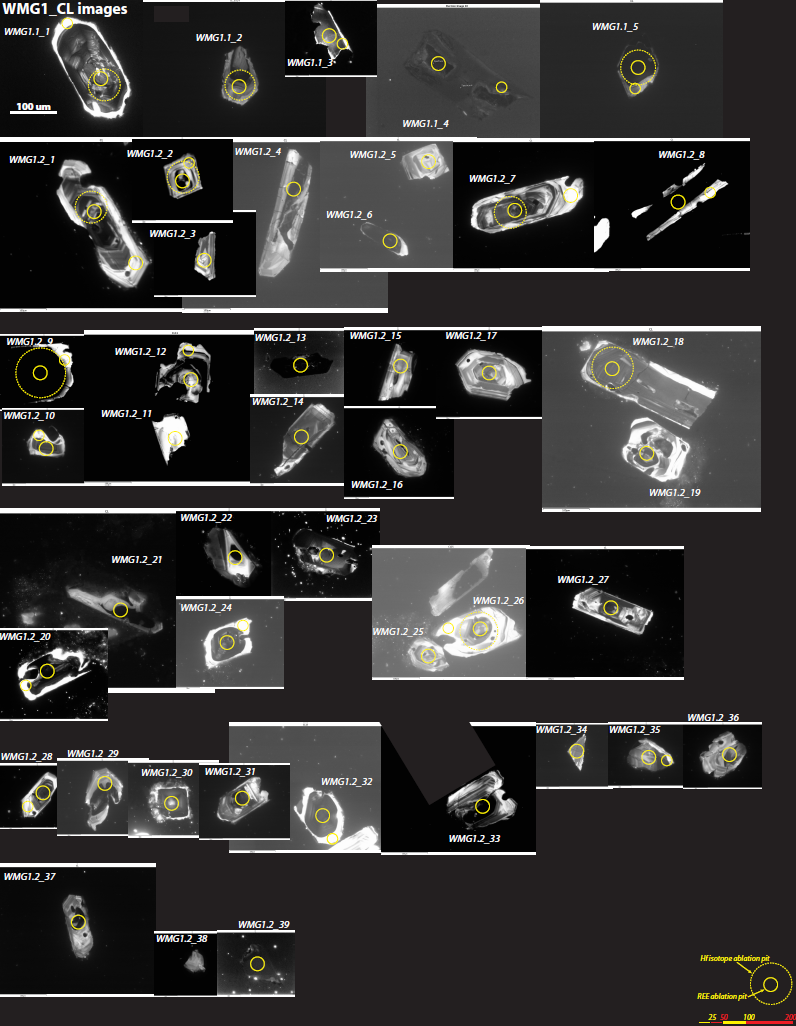


**Ie. BFB1.2, QM1.3, WMG1.3, SHCR1.3, and SAFT8.2**


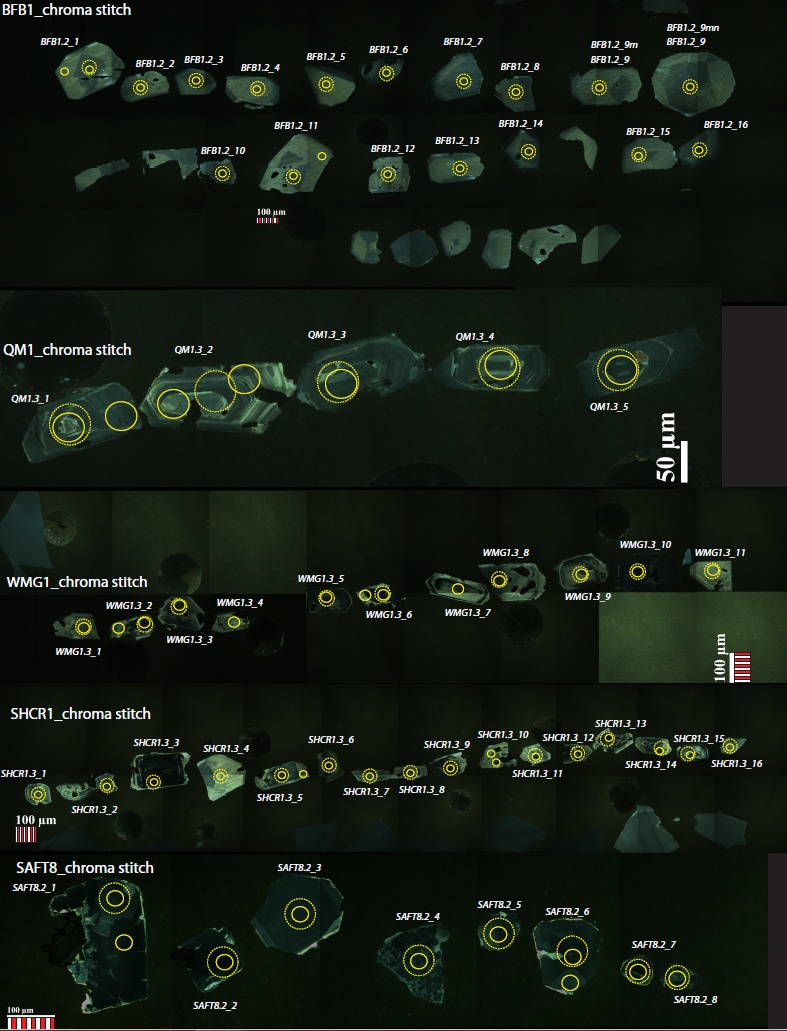


**If. SAFT10 (includes spectral analyses on 3 inclusions in one zircon)**


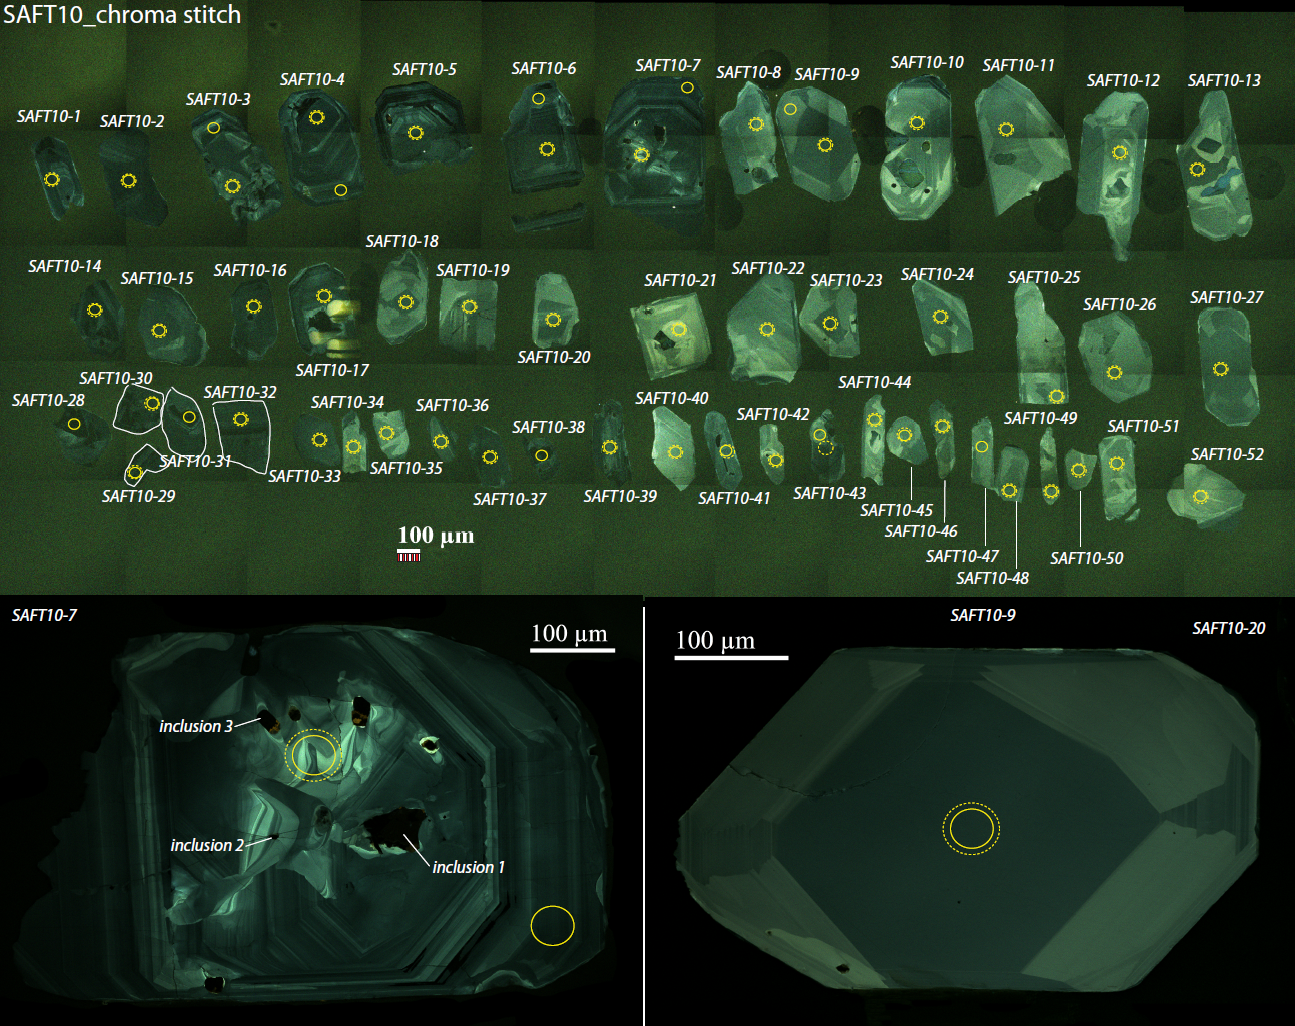


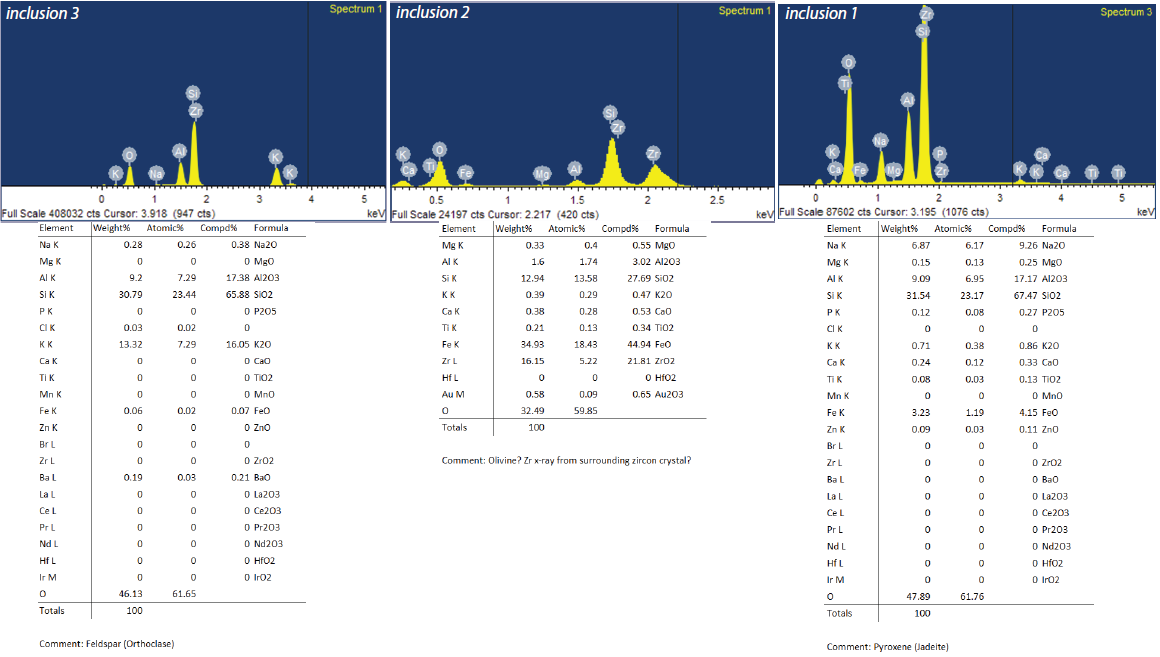

Supplement: Supplementary file 1 [file 38162994]
